# Supplementary material for: Soft template-assisted copper-doped sodium dititanate nanosheet/graphene oxide heterostructure for photoreduction of carbon dioxide to liquid fuels
Source: Royal Society of Chemistry journal article supplement (doi:10.1039/d2ra04283e), 2022-01-01
Supplement: d2ra04283e1.pdf [file d2ra04283e1.pdf]

## Supplementary

### **Soft template-assisted copper-doped sodium dititanate nanosheets/graphene oxide heterostructure for photoreduction of carbon dioxide to liquid fuels**

Napat Lertthanaphol<sup>1</sup>, Natthanicha Prawiset<sup>1</sup>, Pornpinun Soontornapaluk<sup>1</sup>, Nutkamol Kitjanukit<sup>1</sup>, Wannisa Neamsung<sup>1</sup>, Natpichan Pienusa<sup>1</sup>, Kittapas Chusri<sup>1</sup>, Thirawit Sornsuchat<sup>1</sup>, Prowpatchara Chanthara<sup>1</sup>, Poomiwat Phadungbut<sup>1</sup>, Panpailin Seeharaj<sup>2</sup>, Pattaraporn Kim-Lohsoontorn<sup>3</sup>, Sira Srinives<sup>1,\*</sup>

<sup>1</sup> Nanocomposite Engineering Laboratory (NanoCEN), Department of Chemical Engineering, Faculty of Engineering, Mahidol University, Nakornpathom, 73170, Thailand

<sup>2</sup> Advanced Materials Research Unit, Department of Chemistry, Faculty of Science, King Mongkut's Institute of Technology Ladkrabang, Bangkok, 10520, Thailand

<sup>3</sup> Center of Excellence on Catalysis and Catalytic Reaction Engineering, Department of Chemical Engineering, Faculty of Engineering, Chulalongkorn University, Bangkok, 10330, Thailand

*Keywords: Titanium dioxide, CO<sub>2</sub> conversion, Photoreduction, Photocatalyst, Graphene*

*\* To whom correspondence should be addressed.*

*Tel.: +66(0)84 648 2406*

*Email address: sira.sri@mahidol.edu (S. Srinives)*

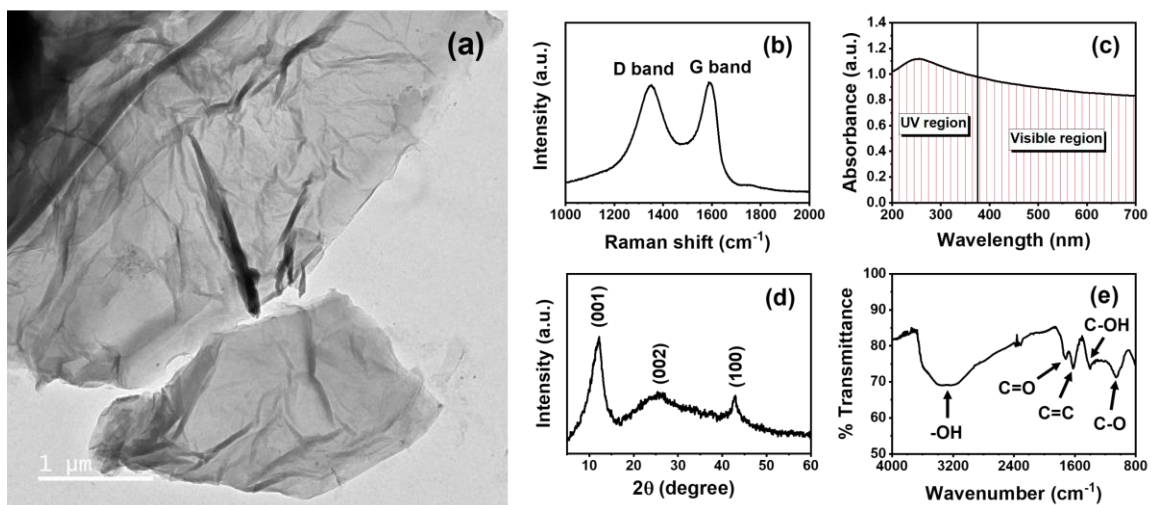

**Figure S1** Characterizations of graphene oxide (GO); (a) HRTEM image, (b) Raman spectrum, (c) UV-vis spectrum, (d) XRD spectrum, (e) FTIR spectrum of GO.

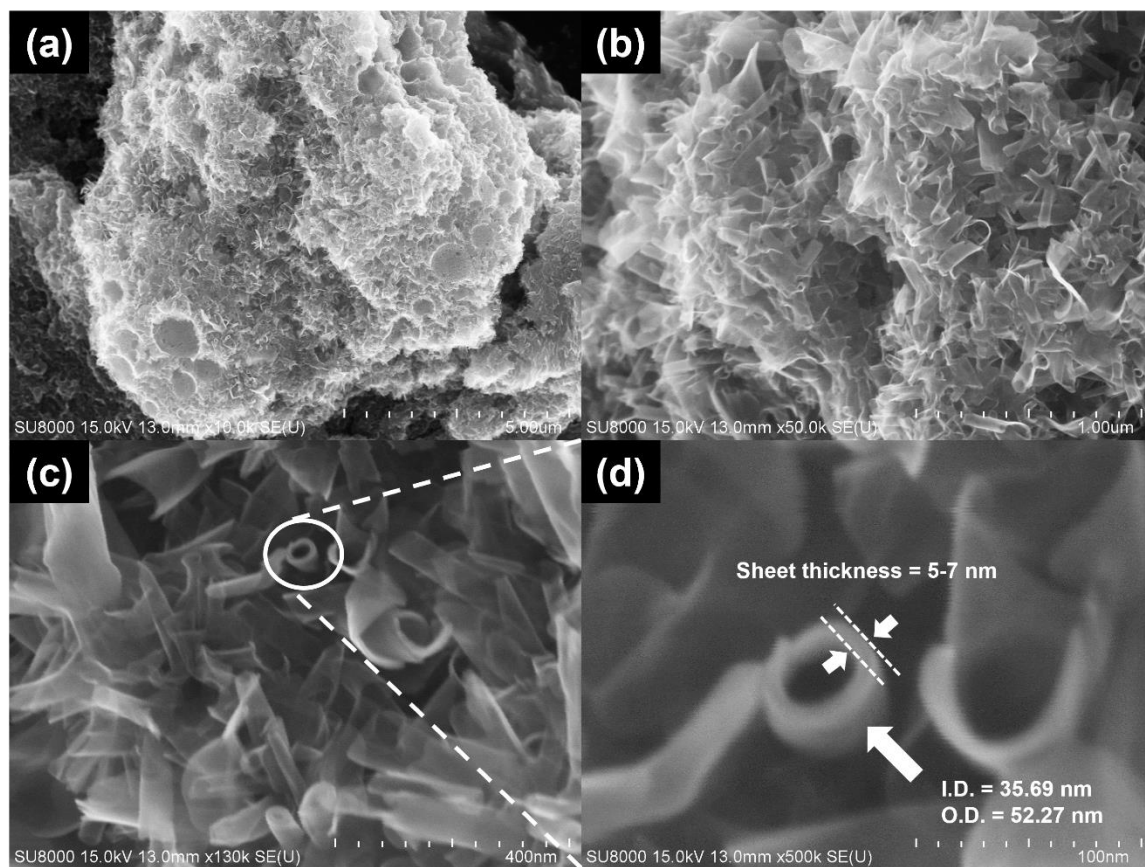

**Figure S2** FESEM images showing CTGN: the composite cluster at x10k magnification (a), at x50k magnification (b), at x50k magnification (c), and rolled-TiO<sub>2</sub> nanosheet at x500k magnification with estimated dimension (d).

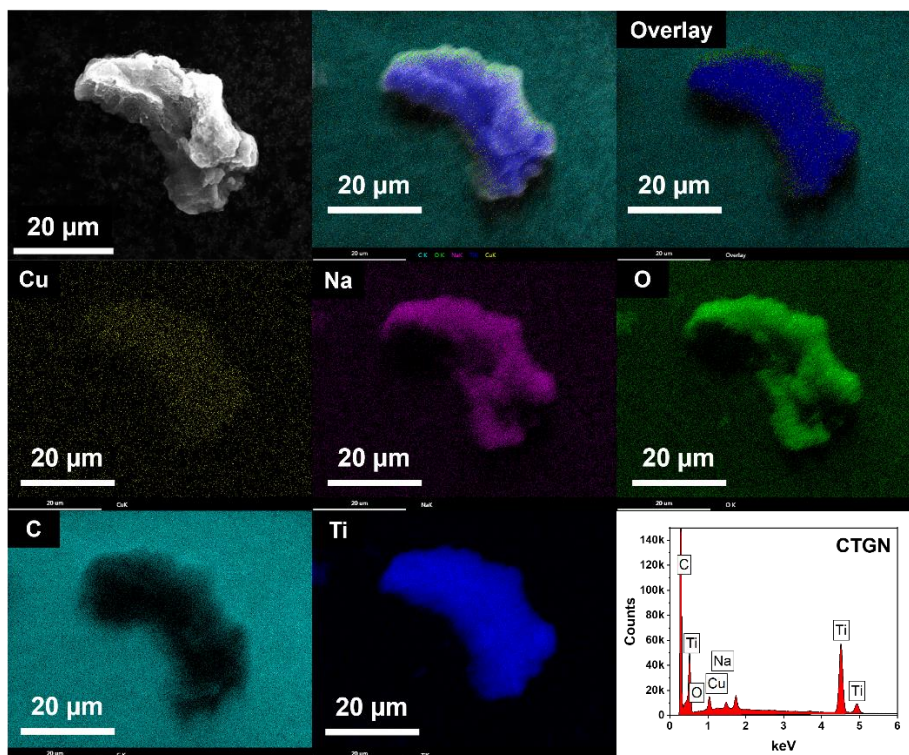

**Figure S3** EDS analysis of CTGN showing an overlay of designated elements, including Cu, Na, O, C, and Ti (Titanium).

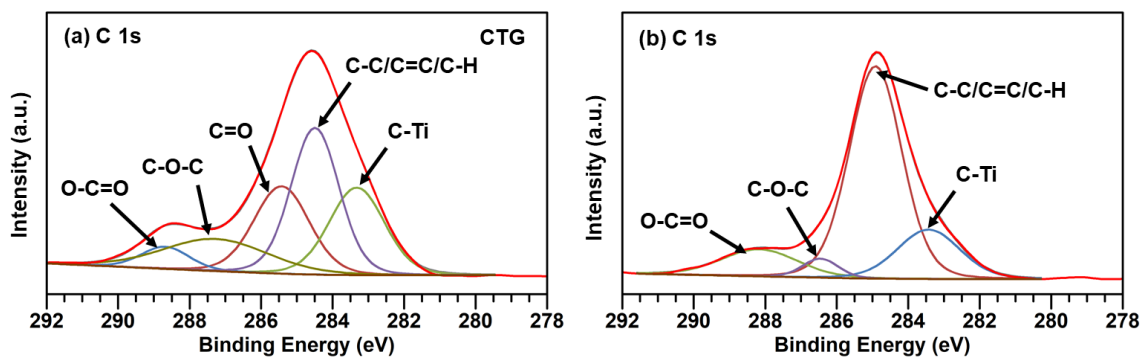

**Figure S4** A narrow scan on C 1s of CTG (a) and CTGN (b)

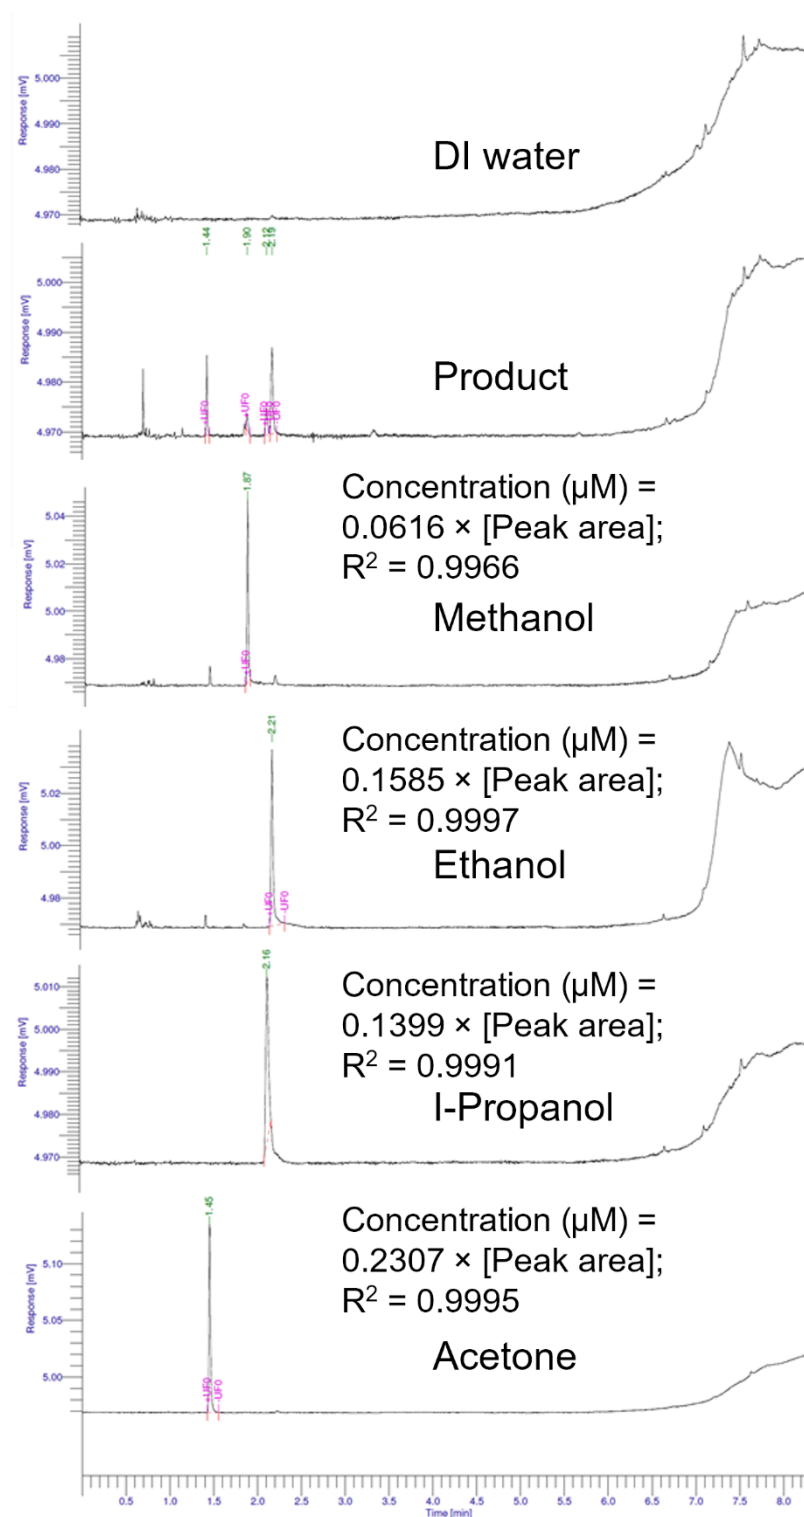

**Figure S5** GC curves showing peaks from a disturbance from DI water (TOP): injection of supernatant from the CO<sub>2</sub> conversion experiment (2<sup>nd</sup> from the top), and a known concentration of acetone (1mM), methanol (1 mM), ethanol (1 mM), and propanol (1 mM).
